# Supplementary material
Source: PubMed Central journal article supplement (PMC3067232)
Supplement: supp_77_4_1309__2.pdf [file supp_77_4_1309__2.pdf]

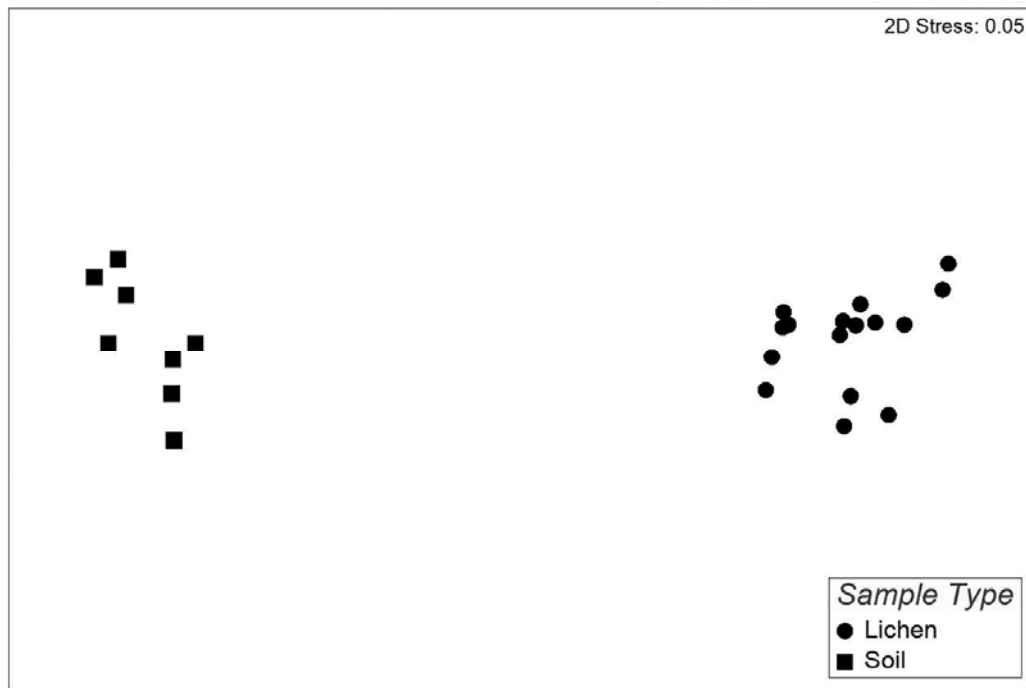

**FIG. S2.** Non-metric multidimensional scaling plot (on a Bray-Curtis distance matrix) depicting patterns of beta diversity for bacterial communities associated with lichen thalli and nearby soil samples collected at Gordon Gulch. Points that are closer together on the ordination have communities that are more similar. The difference between bacterial communities of lichen and soil samples was highly significant ( $P < 0.001$ ) under PERMANOVA analysis.
